# Supplementary material
Source: PubMed Central journal article supplement (PMC6427828)
Supplement: NIHMS1009112-supplement-Supplement.pdf [file NIHMS1009112-supplement-Supplement.pdf]

1 **SUPPORTING INFORMATION**

2 **Identifying and quantifying the intermediate processes during nitrate dependent iron(II)**  
3 **oxidation**

4 *James Jamieson<sup>1,2</sup>, Henning Prommer<sup>1,2,3\*</sup>, Anna H. Kaksonen<sup>3,4</sup>, Jing Sun<sup>1,3</sup>, Adam Siade<sup>1,2,3</sup>, Anna*  
5 *Yusov<sup>5</sup> and Benjamin Bostick<sup>6</sup>*

6 <sup>1</sup>*University of Western Australia, School of Earth Sciences, Western Australia, 6009, Australia*

7 <sup>2</sup>*National Centre for Groundwater Research and Training, Australia*

8 <sup>3</sup>*CSIRO Land and Water, Private Bag No. 5, Wembley, Western Australia, 6913, Australia*

9 <sup>4</sup>*School of Pathology and Laboratory Medicine, University of Western Australia, 35 Stirling Highway,*  
10 *Crawley, Western Australia 6009, Australia*

11 <sup>5</sup>*Department of Chemistry, Barnard College, 3009 Broadway, New York, NY 10027, United States*

12 <sup>6</sup>*Lamont-Doherty Earth Observatory, PO Box 1000, 61 Route 9W, Palisades, NY 10964, United States*

13  
14  
15  
16  
17 **Pages: 10 (including the cover page)**

18  
19 **Figures: 4**

20 **Tables: 4**

21

22

24 **Table S1:** Thermodynamic Gibbs free energies for potential enzymatic NDFO where nitrate  
 25 reduction is coupled to Fe oxidation. Bolded reactions are those used in this study for calculating the  
 26 thermodynamic kinetic term  $F_T$ .

|    |                                                                                                                                                           |          |
|----|-----------------------------------------------------------------------------------------------------------------------------------------------------------|----------|
| 27 | $10Fe^{2+} + 2NO_3^- + 24H_2O \rightarrow 10Fe(OH)_3 + N_2 + 18H^+$                                                                                       | 1        |
| 28 | $30Fe^{2+} + 5HCO_3^- + 2NO_3^- + 54H_2O \rightarrow 5Fe_4^II Fe_2^III(OH)_{12}CO_3 + N_2 + 53H^+$                                                        | 2        |
| 29 | <b><math>2Fe^{2+} + NO_3^- + 5H_2O \rightarrow 2Fe(OH)_3 + NO_2^- + 4H^+</math></b>                                                                       | <b>3</b> |
| 30 | <b><math>6Fe^{2+} + HCO_3^- + NO_3^- + 11H_2O \rightarrow Fe_4^II Fe_2^III(OH)_{12}CO_3 + NO_2^- + 11H^+</math></b>                                       | <b>4</b> |
| 31 | $8Fe^{2+} + 2NO_3^- + 19H_2O \rightarrow 8Fe(OH)_3 + N_2O + 14H^+$                                                                                        | 5        |
| 32 | $24Fe^{2+} + 4HCO_3^- + 2NO_3^- + 43H_2O \rightarrow 4Fe_4^II Fe_2^III(OH)_{12}CO_3 + N_2O + 42H^+$                                                       | 6        |
| 33 | ${}^1\Delta G^{o'} = -100.4 \frac{kJ}{mol}, {}^2\Delta G^{o'} = -50.47 \frac{kJ}{mol}, {}^3\Delta G^{o'} = -69.9 \frac{kJ}{mol}, {}^4\Delta G^{o'} = -40$ |          |
| 34 | $53 \text{ kJ/mol}, {}^5\Delta G^{o'} = -85.8 \text{ kJ/mol}, {}^6\Delta G^{o'} = -45.8 \text{ kJ/mol}$                                                   |          |

35

36

37

38 **Table S2:** Theoretical substrate conversion and growth stoichiometry for *Acidovorax* sp. strain  
 39 BoFeN1 and *Paracoccus denitrificans* strain Pd 1222 from literature data sets used in this study for  
 40 development of [bio](#)geochemical model. Chemodenitrification is ignored giving a conservative  
 41 estimate of the electrons available for nitrate reduction. Molar concentration of biomass growth are  
 42 calculated values taken from models that assume a biomass yield coefficient of 13.92 g per mol of  
 43 acetate, a representative cell formula of C<sub>5</sub>H<sub>7</sub>O<sub>2</sub>N and a cell mass of 0.1 pg/cell.

| Electron Balance<br>(Supplied/Consumed) | Experiments with varying acetate<br>for BoFeN1 |         |         |         | <i>Paracoccus<br/>denitrificans</i> |
|-----------------------------------------|------------------------------------------------|---------|---------|---------|-------------------------------------|
|                                         | Acetate(mM)                                    | 0       | 2       | 5       |                                     |
| Electrons Supplied                      |                                                |         |         |         |                                     |
| Cell Mass <sup>#</sup> (mM)             |                                                | 2.7E-04 | 6.4E-04 | 6.2E-04 | 3.63E-04                            |
| Acetate assimilated (mM) <sup>*</sup>   |                                                | 0.67    | 1.60    | 1.54    | 0.91                                |
| Acetate Oxidized (mM)                   |                                                | 1.33    | 3.40    | 3.46    | 4.09                                |
| Acetate (electrons)                     |                                                | 10.63   | 27.22   | 27.70   | 32.74                               |
| FeSO <sub>4</sub> (electrons)           |                                                | 2.00    | 8.00    | 6.50    | 6.50                                |
| Total Electrons Supplied                |                                                | 12.6    | 35.2    | 34.2    | 39.2                                |
| Electrons Consumed                      |                                                |         |         |         |                                     |
| Nitrate Consumed (mM)                   |                                                | 5       | 10      | 10      | 10                                  |
| Nitrite formed (mM)                     |                                                | 1       | 0.9     | 3.5     | 1.13                                |
| Nitrate - N <sub>2</sub> (electrons)    |                                                | 20      | 45.5    | 32.5    | 44.35                               |
| Nitrate-Nitrite (electrons)             |                                                | 2       | 1.8     | 7       | 2.26                                |
| Total Electrons Consumed                |                                                | 22      | 47      | 40      | 47                                  |
| <b>Electrons Recovered (%)</b>          |                                                | 174     | 134     | 116     | 119                                 |

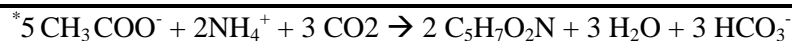

<sup>#</sup> Taken from model input where not stipulated in original source material.

45 **Table S3:** Overall stoichiometric reactions for denitrification for all bacteria species investigated in  
46 simulation S1a. Full stoichiometric reactions were derived using the principles and protocol from  
47 Rittmann and McCarty (2001).

48 *Acidovorax* spp. strain BoFeN

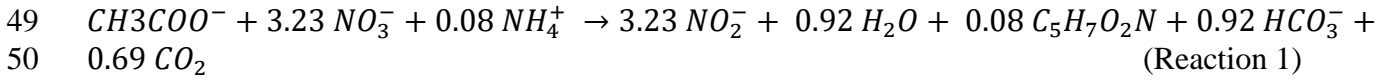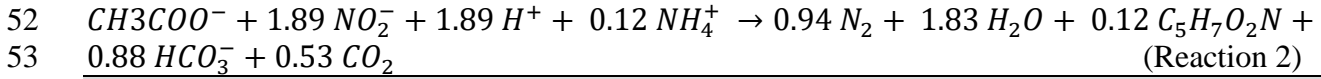

54 *Acidovorax* spp. strain TSPY

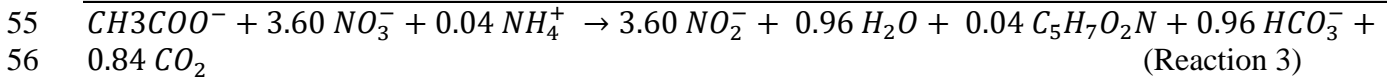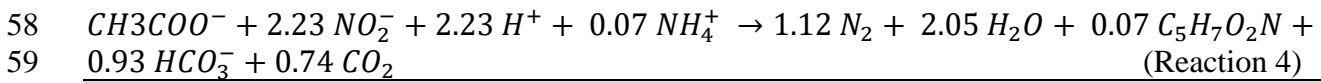

60 *Acidovorax* spp. strain 2AN

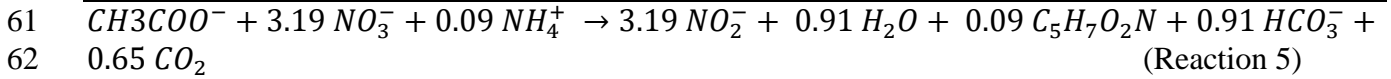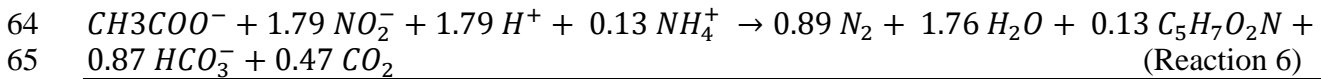

66 *Paracoccus denitrificans* strain Pd 1222

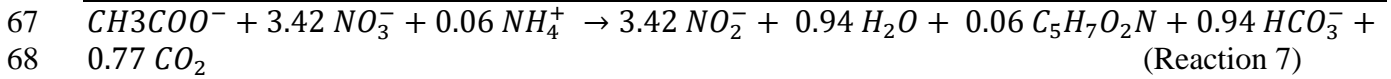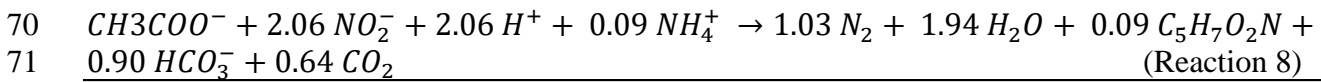

72 *Pseudogulbenkiania* strain 2002

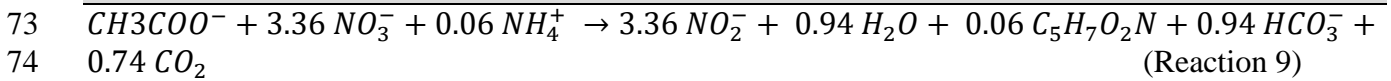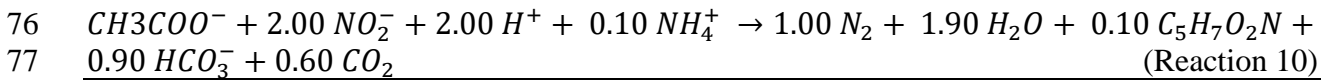

78 (Biomass is represented as  $C_5H_7O_2N$ )

79

80

81 **Table S4:** All model parameters estimated by PEST/PSO for model variant S1a simulations

| Parameter name                                                                                       | Lower limit | Upper limit | Estimated value | Posterior variance | Posterior standard deviation | Estimated value minus two standard deviations* | Estimated value plus two standard deviations* |
|------------------------------------------------------------------------------------------------------|-------------|-------------|-----------------|--------------------|------------------------------|------------------------------------------------|-----------------------------------------------|
| <b>Efficiency parameter (<math>\epsilon</math>) for calculation of full stoichiometric reactions</b> |             |             |                 |                    |                              |                                                |                                               |
| $\epsilon_1$ (BoFeN1)                                                                                | 1.50E-01    | 5.00E-01    | 3.02E-01        | 1.76E-04           | 1.33E-02                     | 2.8E-01                                        | 3.3E-01                                       |
| $\epsilon_2$ (TPSY)                                                                                  | 1.50E-01    | 5.00E-01    | 2.07E-01        | 3.42E-04           | 1.85E-02                     | 1.7E-01                                        | 2.4E-01                                       |
| $\epsilon_3$ (2AN)                                                                                   | 1.50E-01    | 5.00E-01    | 3.01E-01        | 2.16E-04           | 1.47E-02                     | 2.7E-01                                        | 3.3E-01                                       |
| $\epsilon_4$ (Pd 1222)                                                                               | 1.50E-01    | 5.00E-01    | 2.60E-01        | 2.21E-04           | 1.49E-02                     | 2.3E-01                                        | 2.9E-01                                       |
| $\epsilon_5$ (2002)                                                                                  | 1.50E-01    | 5.00E-01    | 2.75E-01        | 2.37E-04           | 1.54E-02                     | 2.4E-01                                        | 3.1E-01                                       |
| <b>Parameters for microbial respiration of nitrate reduction to nitrite</b>                          |             |             |                 |                    |                              |                                                |                                               |
| $K_D$                                                                                                | 1.00E-07    | 1.00E-02    | 2.18E-03        | 6.52E-01           | 8.08E-01                     | 1.0E-07                                        | 1.0E-02                                       |
| $K_A$                                                                                                | 1.00E-07    | 1.00E-03    | 2.38E-05        | 2.08E-02           | 1.44E-01                     | 1.0E-07                                        | 1.0E-03                                       |
| $k_1$                                                                                                | 1.00E-06    | 1.00E-03    | 7.99E-05        | 9.999E-01          | 9.999E-01                    | 1.0E-06                                        | 1.0E-03                                       |
| <b>Parameters for microbial respiration of nitrite reduction to dinitrogen</b>                       |             |             |                 |                    |                              |                                                |                                               |
| $K_D$                                                                                                | 1.00E-07    | 1.00E-03    | 2.25E-05        | 8.34E-01           | 9.13E-01                     | 1.0E-07                                        | 1.0E-03                                       |
| $K_A$                                                                                                | 1.00E-07    | 1.00E-03    | 3.50E-06        | 8.11E-04           | 2.85E-02                     | 1.0E-07                                        | 1.0E-03                                       |
| $k_1$                                                                                                | 1.00E-06    | 1.00E-03    | 1.10E-04        | 4.58E-04           | 2.14E-02                     | 1.0E-06                                        | 1.0E-03                                       |
| Encrustation                                                                                         |             |             |                 |                    |                              |                                                |                                               |
| Inhibition                                                                                           | 1.00E-04    | 1.00E-02    | 7.59E-03        | 7.28E-01           | 8.53E-01                     | 1.0E-04                                        | 1.0E-02                                       |

\*If the interval goes beyond specified upper or lower limits, the limit value is listed instead.

82

83

84 **Figure S1:** Enzymatic Fe(II) oxidation rate for all strains investigated were calibrated from batch  
85 experiments with solution media containing nitrate but where Fe(II) was added as the sole electron  
86 donor. Selected data from these 'chemolithoautotrophic' batch experiments were used as biogenic  
87 nitrite from heterotrophic nitrate reduction could be ignored. Results are presented for *Acidovorax*  
88 spp. strains BoFeN1 (left), TSPY (middle) and 2AN (right) from Klueglein and Kappler<sup>1</sup>, Carlson et  
89 al.<sup>2</sup> and Chakraborty et al.<sup>3</sup>, respectively. Solid lines represent simulation results while symbols  
90 represent observed concentrations for total Fe(II) (red circle), nitrate (blue down triangle) and nitrite  
91 (yellow square).

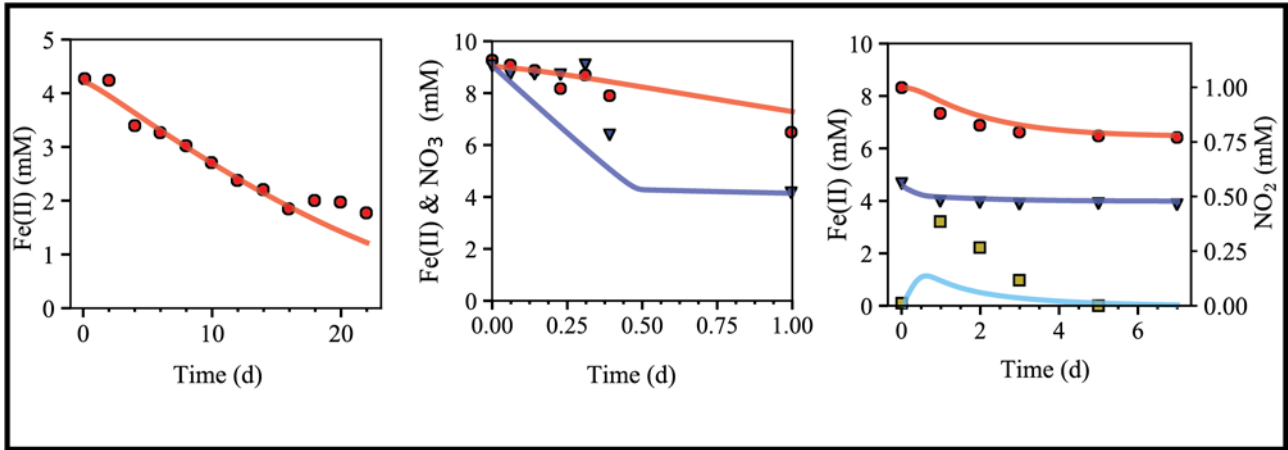

92

93

94

95 **Figure S2:** Green rust Fe(II) oxidation rate. Rate constant ( $k_5$ ) calibrated from data collected by  
96 Hansen et al<sup>4</sup>.

97

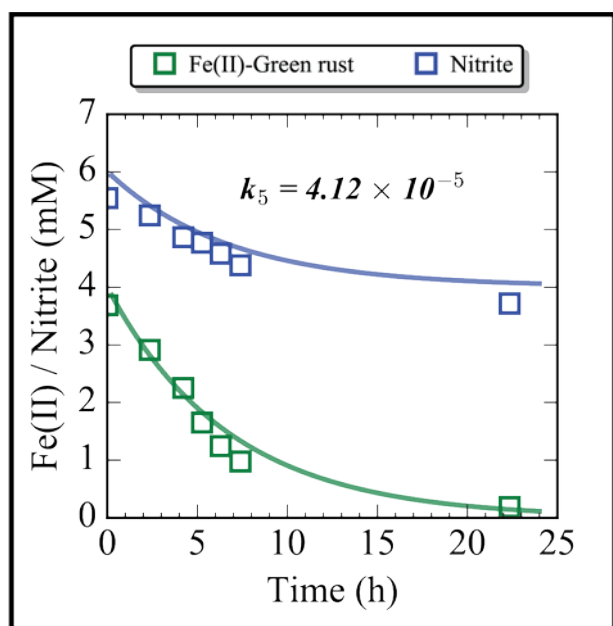

98

99

100

101 **Figure S3:** Simulation of Fe(II) concentrations (solid lines) during NDFO in *Acidovorax* sp. strain  
102 BoFeN1 (bottom panel) and TPSY (top panel) growth incubations at different acetate (Ace)  
103 concentrations. Symbols represent observed concentrations of Fe(II) from experiments within  
104 Kappler et al.<sup>5</sup> and Carlson et al.<sup>2</sup>

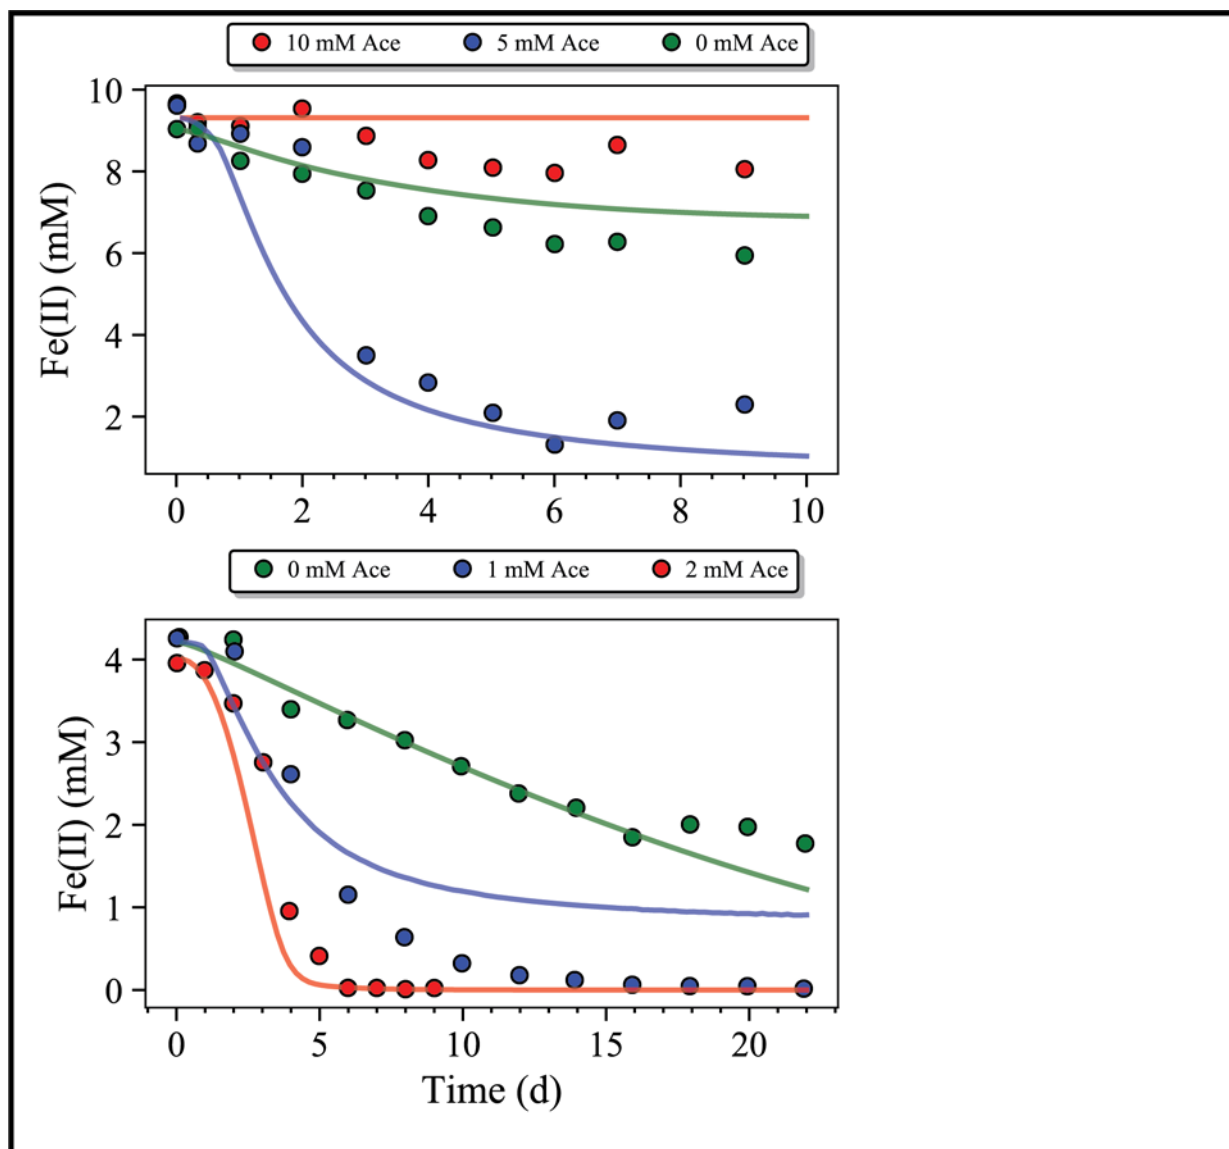

105



106 **Figure S4:** S1a (solid line) and S2 (dashed line) model simulation results for nitrous oxide for strain  
107 *Acidovorax sp.* strain TPSY. Symbols represent observed concentrations of nitrous oxide from  
108 experiments within Carlson et al.<sup>2</sup>

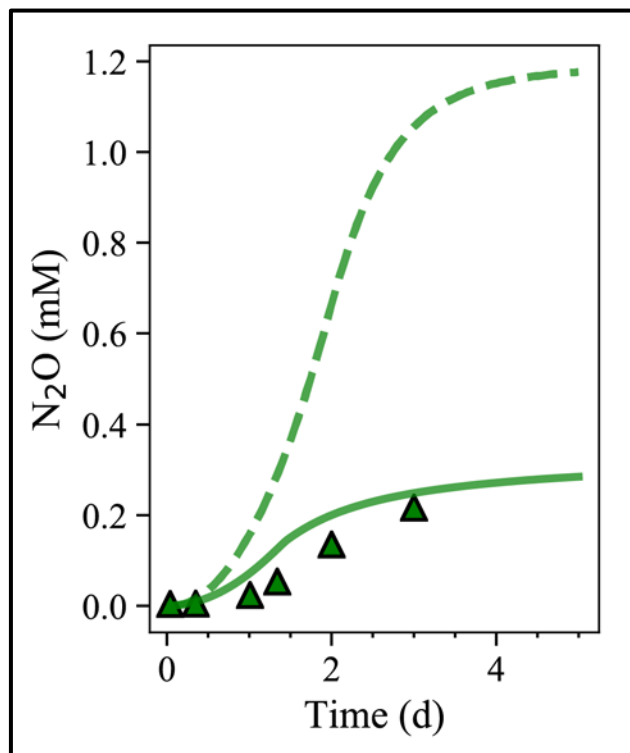

109

110 **REFERENCES**

- 111 (1) Klueglein, N.; Kappler, A. Abiotic oxidation of Fe(II) by reactive nitrogen species in  
112 cultures of the nitrate-reducing Fe(II) oxidizer *Acidovorax* sp. BoFeN1 – questioning the existence  
113 of enzymatic Fe(II) oxidation. *Geobiology* **2013**, *11*, 180-190.
- 114 (2) Carlson, H. K.; Clark, I. C.; Blazewicz, S. J.; Iavarone, A. T.; Coates, J. D. Fe(II)  
115 Oxidation Is an Innate Capability of Nitrate-Reducing Bacteria That Involves Abiotic and Biotic  
116 Reactions. *Journal of Bacteriology* **2013**, *195*, 3260-3268.
- 117 (3) Chakraborty, A.; Roden, E. E.; Schieber, J.; Picardal, F. Enhanced Growth of  
118 *Acidovorax* sp. Strain 2AN during Nitrate-Dependent Fe(II) Oxidation in Batch and Continuous-  
119 Flow Systems. *Applied and Environmental Microbiology* **2011**, *77*, 8548-8556.
- 120 (4) Hansen, H. C. B.; Borggaard, O. K.; Sørensen, J. Evaluation of the free energy of  
121 formation of Fe(II)-Fe(III) hydroxide-sulphate (green rust) and its reduction of nitrite. *Geochimica et*  
122 *Cosmochimica Acta* **1994**, *58*, 2599-2608.
- 123 (5) Kappler, A.; Schink, B.; Newman, D. K. Fe(III) mineral formation and cell  
124 encrustation by the nitrate-dependent Fe(II)-oxidizer strain BoFeN1. *Geobiology* **2005**, *3*, 235-245.
- 125
